# Supplementary material
Source: PubMed Central journal article supplement (PMC7239635)
Supplement: mmc1.pdf [file mmc1.pdf]

# THE LANCET Infectious Diseases

## Supplementary webappendix

This webappendix formed part of the original submission and has been peer reviewed. We post it as supplied by the authors.

Supplement to: Peak CM, Kahn R, Grad YH, et al. Individual quarantine versus active monitoring of contacts for the mitigation of COVID-19: a modelling study. *Lancet Infect Dis* 2020; published online May 20. [https://doi.org/10.1016/S1473-3099\(20\)30361-3](https://doi.org/10.1016/S1473-3099(20)30361-3).

## Appendix.

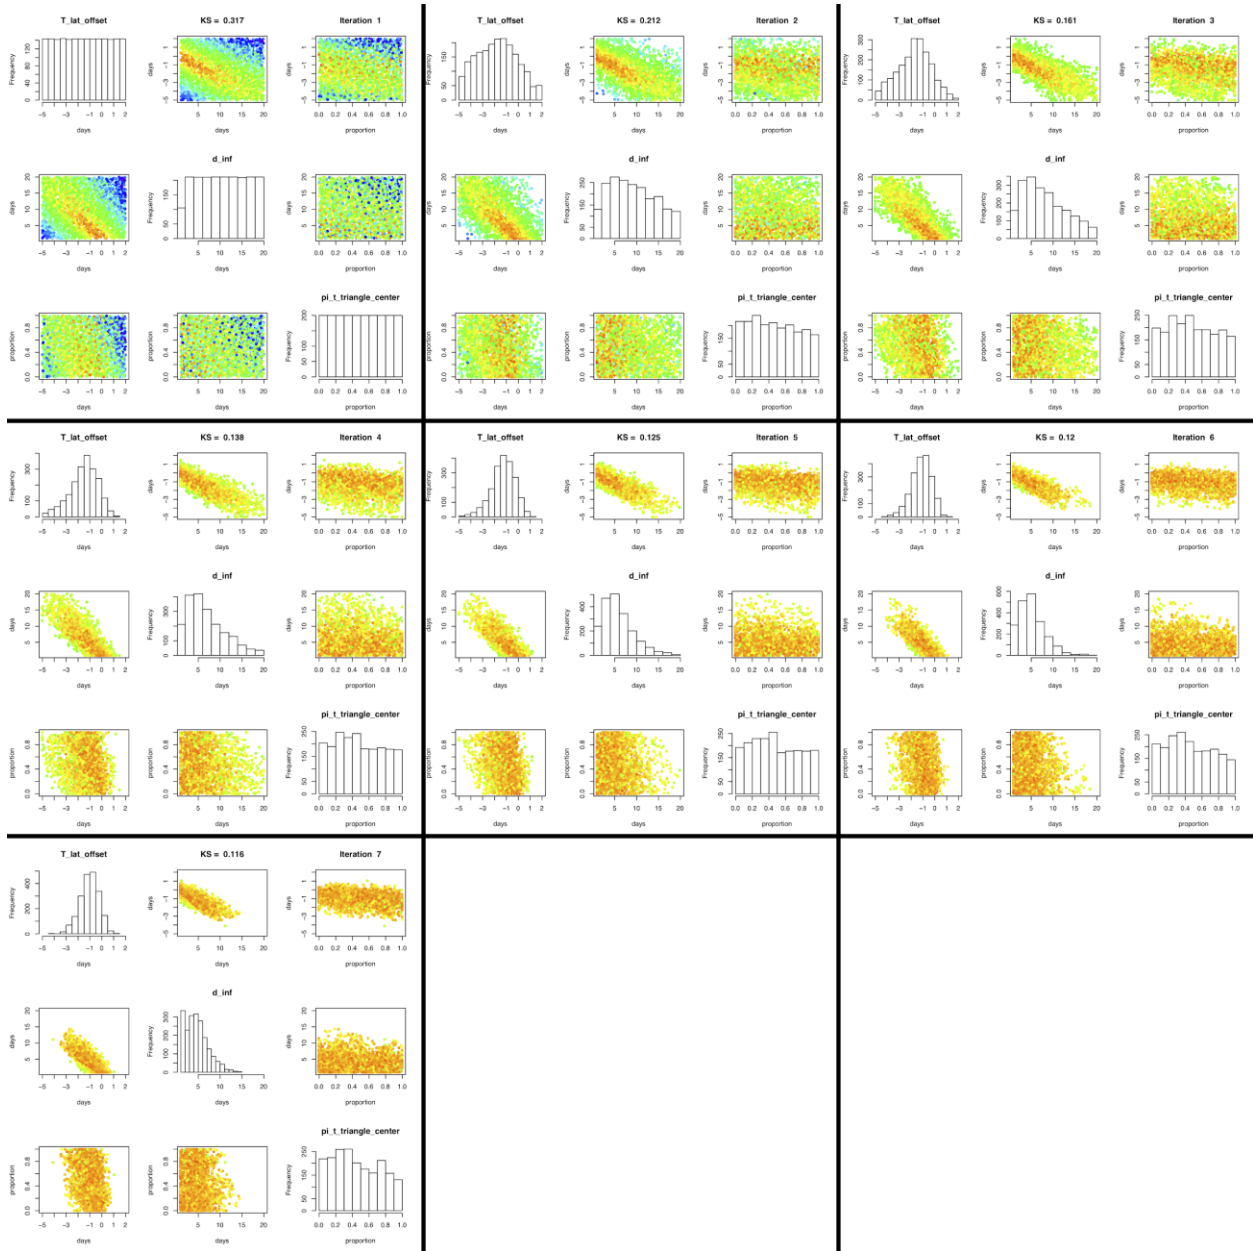

**Figure S1: Parameters fit to serial interval scenario 1**

Univariate histograms and bivariate heatmaps for each of three input parameters in serial interval scenario 1: the time offset between the latent and incubation periods ( $T_{OFFSET}$ ); maximum duration of infectiousness ( $d_{INF}$ ); and time of relative peak infectiousness ( $\beta_t$ ). Convergence by sequential monte carlo (SMC) in iteration 7 with median Kolmogorov-Smirnov test statistic  $KS = 0.116$ .

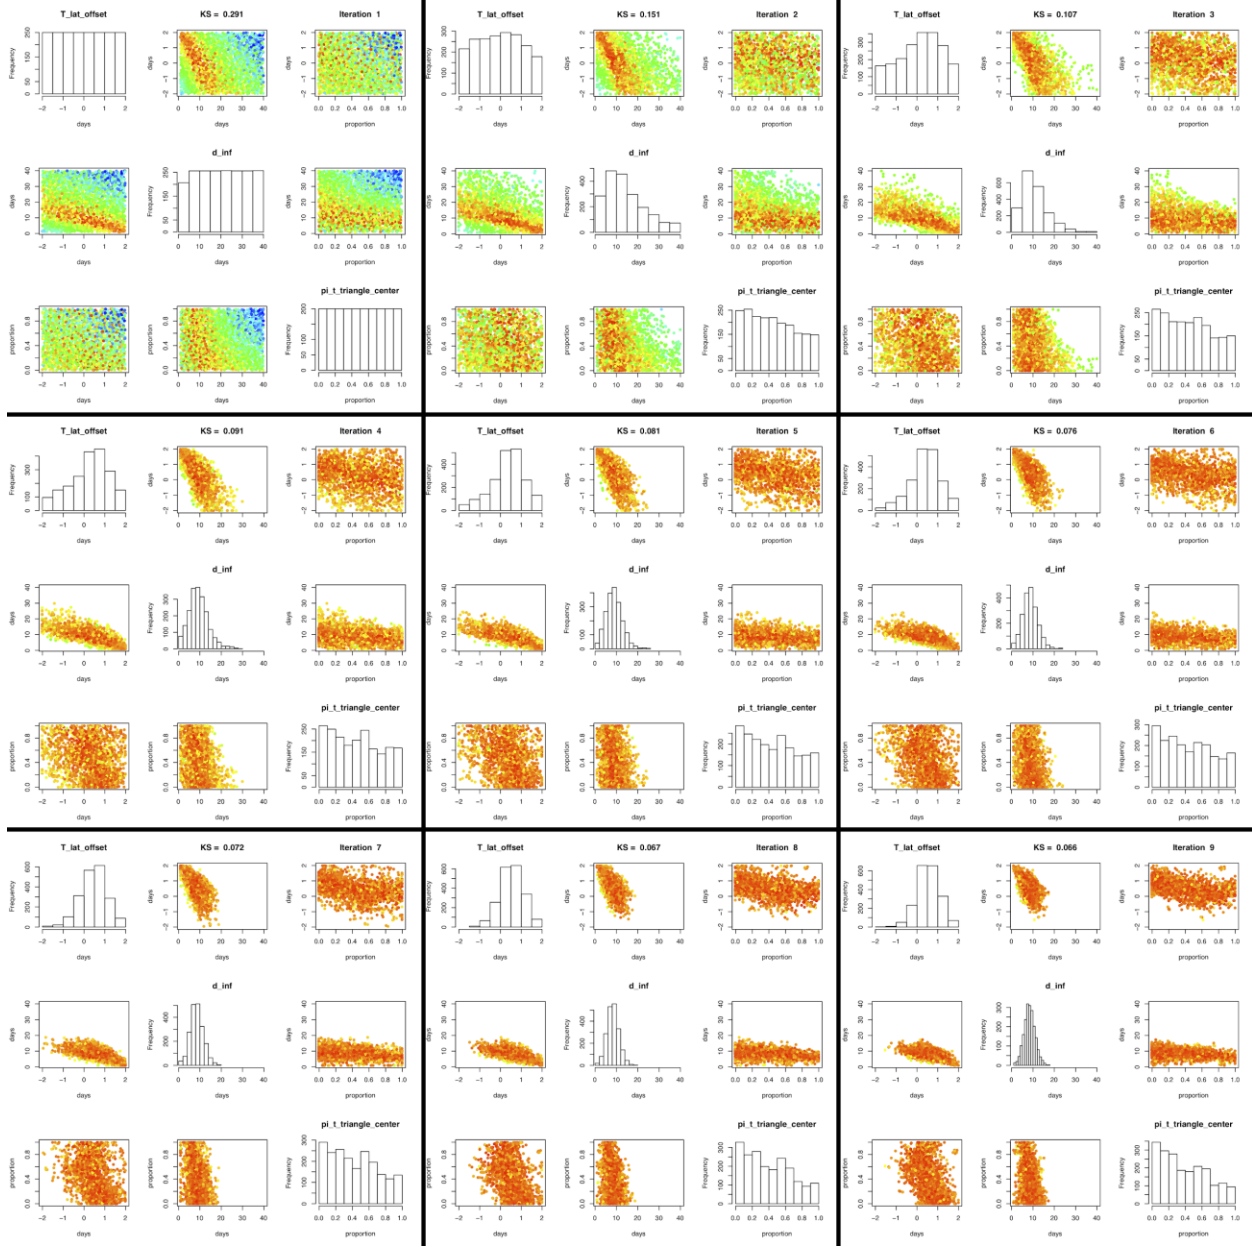

**Figure S2: Parameters fit to serial interval scenario 2**

Univariate histograms and bivariate heatmaps for each of three input parameters in serial interval scenario 2: the time offset between the latent and incubation periods ( $T_{OFFSET}$ ); maximum duration of infectiousness ( $D_{INF}$ ); and time of relative peak infectiousness ( $\beta_{\tau}$ ). Convergence by sequential monte carlo (SMC) in iteration 7 with median Kolmogorov-Smirnov test statistic  $KS = 0.066$ .

**Table S1.** Intervention Parameters

| <b>Parameter</b>                                                                                                      | <b>High feasibility setting</b> | <b>Low feasibility setting</b> |
|-----------------------------------------------------------------------------------------------------------------------|---------------------------------|--------------------------------|
| Probability of tracing an infected contact ( $P_{CT}$ )                                                               | 0.9                             | 0.5                            |
| Delay in tracing a contact ( $D_{CT}$ )                                                                               | $0.5 \pm 0.5$ days              | $2 \pm 2$ days                 |
| Reduction in infectiousness during quarantine ( <i>for pre-symptomatic contacts under quarantine</i> ) ( $\gamma_q$ ) | 0.75                            | 0.25                           |
| Frequency of monitoring symptoms ( <i>for pre-symptomatic contacts under active monitoring</i> ) ( $D_{SM}$ )         | $0.5 \pm 0.5$ days              | $2 \pm 2$ days                 |
| Reduction in infectiousness during isolation ( $\gamma_i$ )                                                           | 0.9                             | 0.5                            |
